# Supplementary material for: The Gq signalling pathway inhibits brown and beige adipose tissue
Source: PubMed Central journal article supplement (PMC4786868; doi:10.1038/ncomms10895), 2016-03-09
Supplement: ncomms10895-s1.pdf [file ncomms10895-s1.pdf]

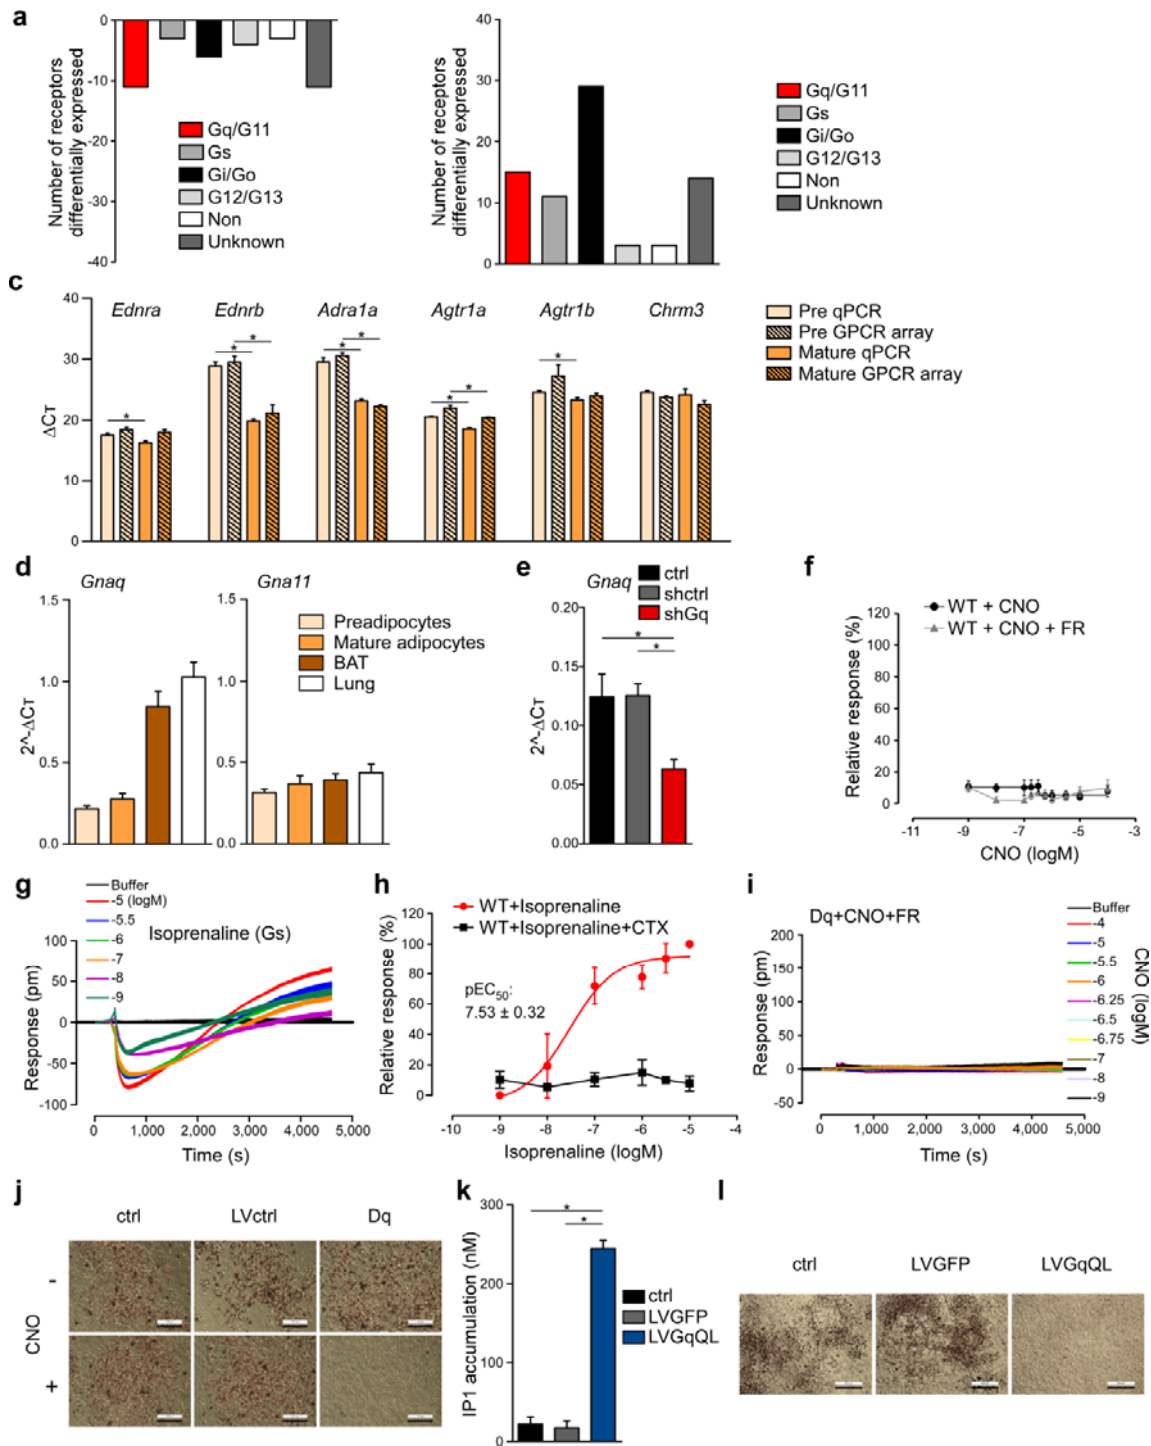

**Supplementary Figure 1: GPCR profiling and G<sub>q</sub> signaling in murine brown adipocytes (BA).** **a**, Number of GPCRs with 2-fold lower expression in mature BA vs. preadipocytes. **b**, Number of GPCRs with 2-fold higher expression in mature BA vs. preadipocytes. **c**, GPCR validation; the mRNA expression of G<sub>q</sub> coupled GPCRS detected in murine preadipocytes (pre) and mature brown adipocytes (mature) with qPCR or with a GPCR array. Ct values were normalized to 18S. t-test, \**P*<0.05. **d**,

Relative mRNA expression of  $G_q$  and  $G_{11}$  in preadipocytes, BA and BAT. ANOVA,  $*P<0.05$ . **e**, Relative mRNA expression of  $G_q$  in untransduced cells and cells transduced with shctrl or shGq. ANOVA,  $*P<0.05$ . **f**, Concentration-effect curve for wild-type cells treated with CNO, in presence and absence of FR. **g**, Representative traces of label-free DMR in brown preadipocytes stimulated with isoprenaline. **h**, Concentration-effect curve of WT cells stimulated with isoprenaline, in presence and absence of  $G_s$  inhibitor cholera toxin (CTX). **i**, Representative traces of cells expressing Dq stimulated with CNO and FR. **j**, Oil Red O stain of BA transduced with control virus (LVctrl) or virus containing Dq and differentiated in presence or absence of CNO. Scale bar, 10  $\mu\text{m}$ . **k**, IP1 accumulation (nM) in untransduced preadipocytes and preadipocytes stably expressing GFP (LVGFP) or GqQL (LVGqQL). ANOVA,  $*P<0.05$ . **l**, Oil Red O stain of BA transduced with LVGFP or LVGqQL. Scale bar, 20  $\mu\text{m}$ . **a-b**,  $n=3$  independent arrays. **c,d**,  $n = 4$ . **e**,  $n = 5$ . **f-i**,  $n = 3$ . **j**,  $n = 4$ . **k**,  $n = 3$ . **l** = 5. All data are shown as mean $\pm$ s.e.m.

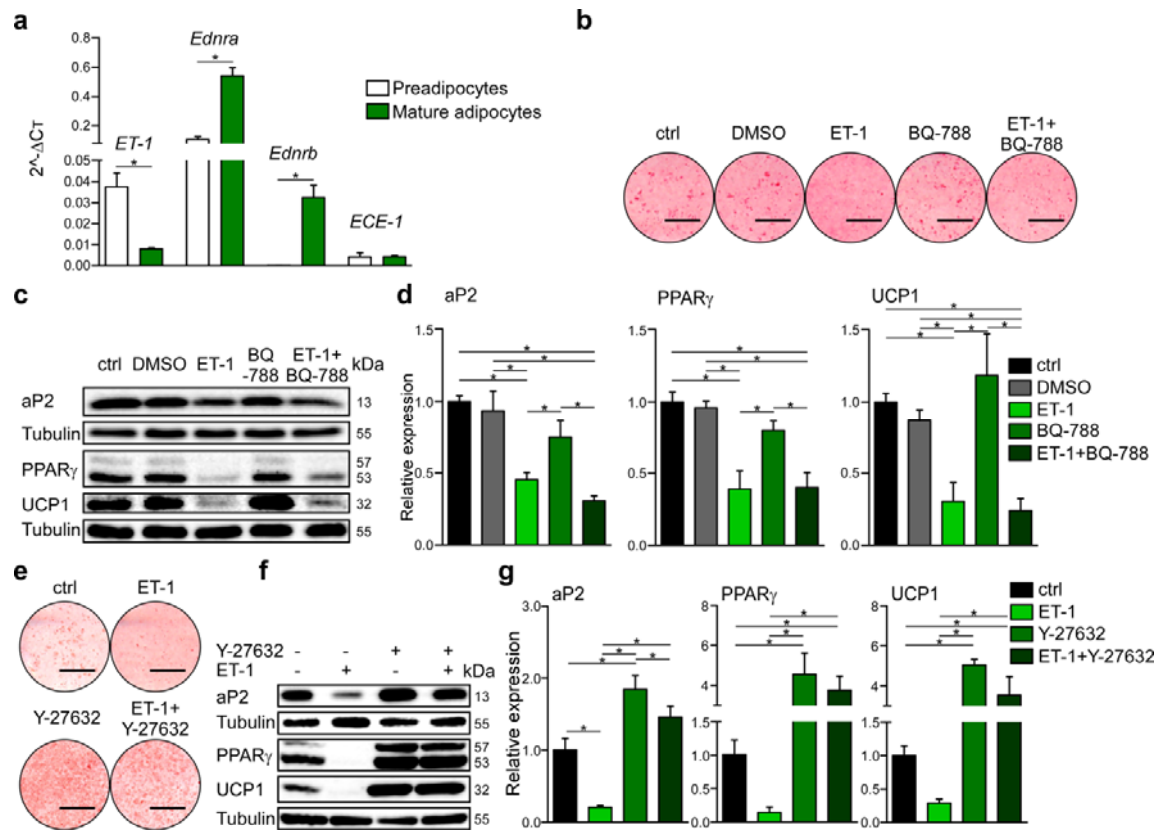

**Supplementary Figure 2: Role of Endothelin-1 in differentiation and downstream signaling of G<sub>q</sub>.** **a**, Relative mRNA expression of endothelin system in preadipocytes and mature BA: *endothelin-1* (*ET-1*), *endothelin receptor type A and B* (*Ednra*, *Ednrb*), *Endothelin converting enzyme-1* (*ECE-1*). t-test, \**P*<0.05. **b**, Oil Red O stain of BA chronically treated with ET-1, Ednrb inhibitor BQ-788, or both. Scale bar, 1 cm. **c,d**, Representative immunoblots (**c**) and quantification (**d**) of adipogenic markers and UCP1 after treatment of BA with and without ET-1, BQ-788 or both. ANOVA, \**P*<0.05. **e**, Oil Red O stain of BA chronically treated with ET-1, Y-27632, or both. Scale bar, 1 cm. **f,g**, Representative immunoblots (**f**) and quantification (**g**) of adipogenic markers (aP2; PPAR<sub>γ</sub>) and UCP1 after treatment of BA with and without ET-1, Y-27632 or both. ANOVA, \**P*<0.05. **a**, n = 4. **b-g**, n = 3. All data are shown as mean±s.e.m.

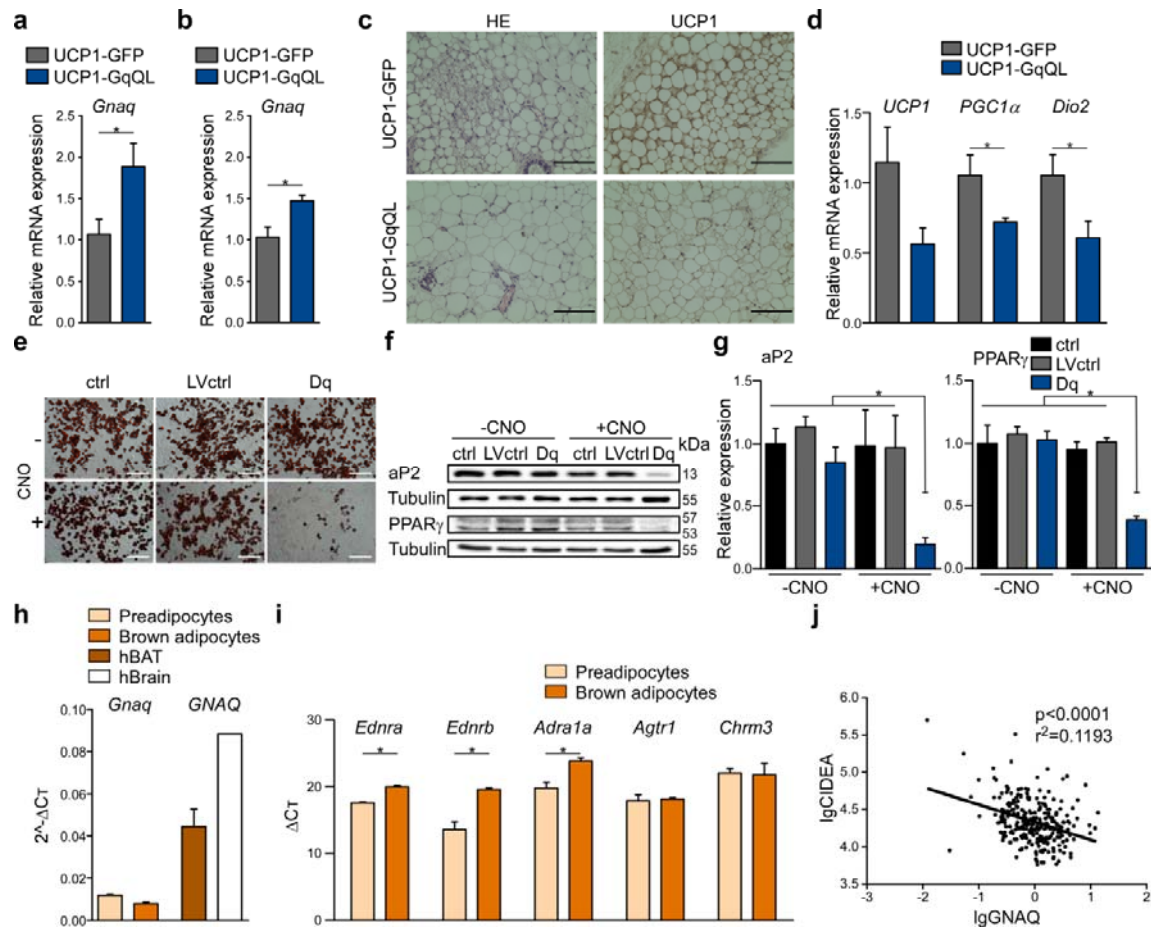

**Supplementary Figure 3:  $G_q$  activation reduces browning of WAT *in vivo*.** **a,b**, Relative mRNA expression of  $G_q$  in inguinal (**a**) and gonadal/visceral (**b**) WAT of UCP1-GFP and UCP1-GqQL mice. t-test,  $*P < 0.05$ . **c**, Representative HE and UCP1 staining of gonadal/visceral WAT in UCP1-GFP and UCP1-GqQL mice after cold stimulation. Scale bar, 100  $\mu$ m. **d**, Relative mRNA expression of thermogenic markers in gonadal/visceral WAT of UCP1-GqQL relative to UCP1-GFP mice. t-test,  $*P < 0.05$ . **e**, Oil Red O stain of WAT transduced with control virus (LVctrl) or virus containing Dq differentiated in presence or absence of CNO. Scale bar, 20  $\mu$ m. **f,g**, Representative immunoblots (**f**) and quantification (**g**) of aP2 and PPAR $\gamma$  in WAT transduced with LVctrl or Dq and differentiated in presence or absence of CNO. ANOVA,  $*P < 0.05$ . **h**, Relative mRNA expression of  $G_q$  in human preadipocytes, mature adipocytes and human BAT normalized to *ACTB* ( $\beta$ -actin). **i**, mRNA expression of  $G_q$  coupled GPCRs in preadipocyte hMADS and mature hMADS determined by qPCR. Ct values were normalized to 28S. t-test,  $*P < 0.05$ . **j**, Correlation of  $G_q$  and *CIDEA* expression in human WAT. **a-d**, 6 animals per group were analysed. **e-i**,  $n = 4-5$ . **j**, 266 human abdominal WAT samples were analyzed. All data are shown as mean  $\pm$  s.e.m.

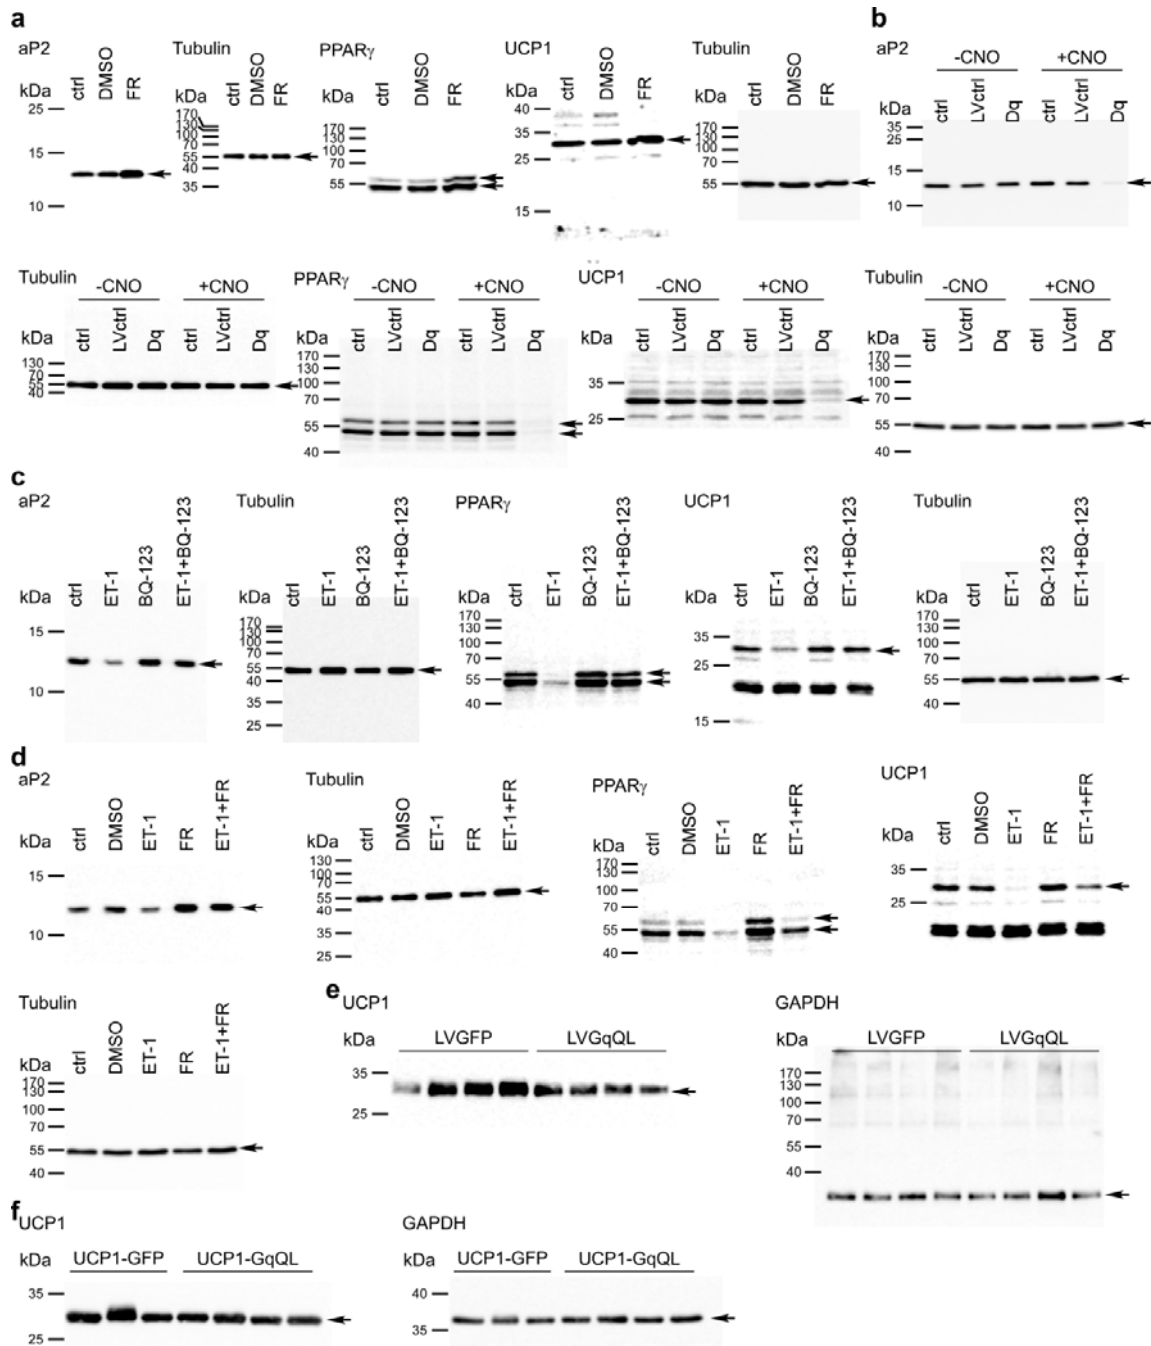

**Supplementary Figure 4: Complete immunoblots of sections shown in Figures 1-3. a**, Complete immunoblots of aP2, PPAR $\gamma$ , UCP1 and Tubulin of sections shown in **Fig. 1e**. **b**, Complete immunoblots of aP2, PPAR $\gamma$ , UCP1 and Tubulin of sections shown in **Fig. 1k**. **c**, Complete immunoblots of aP2, PPAR $\gamma$ , UCP1 and Tubulin of sections shown in **Fig. 2c**. **d**, Complete immunoblots of aP2, PPAR $\gamma$ , UCP1 and Tubulin of sections shown in **Fig. 2f**. **e**, Representative immunoblots of UCP1 and GAPDH of sections shown in **Fig. 3d**. **f**, Representative immunoblots of UCP1 and GAPDH of sections shown in **Fig. 3g**.

**Supplementary Table 1: GPCRs expressed in brown preadipocytes**

| Name           | $\Delta C_t$ | Primary Linkage or role |
|----------------|--------------|-------------------------|
| ADCYAP1R1      | 21.7         | Gs                      |
| ADMR           | 21.8         | Unknown                 |
| ADORA2A        | 22.6         | Gs                      |
| ADORA2B        | 19.8         | Gs                      |
| ADRA1B         | 19.2         | Gq/11                   |
| ADRA1D         | 16.9         | Gq/11                   |
| ADRA2A         | 21.5         | Gi/0                    |
| ADRA2B         | 22.7         | Gi/0                    |
| ADRB1          | 19.8         | Gs                      |
| ADRB2          | 22.9         | Gs                      |
| ADRB3          | 26.2         | Gs                      |
| AGTR1A         | 21.9         | Gi/0, Gq/11             |
| AGTR2          | 20.7         | Gi/0                    |
| AGTRL1         | 24.7         | Gi/0                    |
| AVPR1A         | 20.0         | Gq/11                   |
| BAI1 (ADGRB1)  | 24.4         | Unknown                 |
| BAI2 (ADGRB2)  | 23.4         | G16 (Gq)                |
| BDKRB1         | 23.3         | Gi/0, Gq/11             |
| BDKRB2         | 24.2         | Gs, Gi/0, Gq/11         |
| C3AR1          | 21.9         | Unknown                 |
| C5R1           | 21.2         | Gi/0                    |
| CALCRL         | 19.0         | Gs                      |
| CCR1           | 24.7         | Gi/0                    |
| CCR2           | 22.4         | Gi/0                    |
| CCR3           | 24.4         | Gi/0                    |
| CCR4           | 24.9         | Gi/0                    |
| CCR8           | 23.4         | Gi/0                    |
| CCR9           | 22.9         | Gi/0                    |
| CCRL1 (CX3CR1) | 22.7         | Gi/0                    |
| CCRL2          | 22.5         | Unknown                 |
| CD97 (ADGRE5)  | 16.1         | G12/13                  |
| CELSR1         | 22.6         | Other                   |
| CELSR2         | 22.2         | Other                   |
| CHRM1          | 25.5         | Gq/11                   |
| CHRM2          | 22.7         | Gi/0                    |
| CHRM3          | 23.8         | Gq/11                   |

|                |      |                                      |
|----------------|------|--------------------------------------|
| CHRM4          | 22.2 | Gi/0                                 |
| CHRM5          | 24.4 | Gq/11                                |
| CMKLR1         | 21.5 | Gi/0                                 |
| CMKOR1 (ACKR3) | 24.1 | Unknown                              |
| CNR1           | 22.4 | Gi/0                                 |
| CX3CR1         | 22.5 | Gi/0                                 |
| CXCR3          | 26.4 | Gi/0                                 |
| CXCR6          | 22.1 | Gi/0                                 |
| DRD4           | 25.1 | Gi/0                                 |
| DUSP2          | 26.3 | Unknown                              |
| EDG1 (S1PR1)   | 19.6 | Gi/0                                 |
| EDG2 (LPAR1)   | 17.2 | Gi/0, Gq/11, G12/13                  |
| EDG3 (S1PR3)   | 22.3 | Gi/0, Gq/11, G12/13                  |
| EDG4 (LPAR2)   | 18.7 | Gi/0, Gq/11, G12/13                  |
| EDG5 (S1PR2)   | 24.4 | Gq/11, G12/13, Gs                    |
| EDG6 (S1PR4)   | 24.5 | Gi/0, G12/13                         |
| EDG7 (LPAR3)   | 21.7 | Gi/0, Gq/11                          |
| EDG8 (S1PR5)   | 24.0 | Gi/0, G12/13                         |
| EDNRA          | 18.4 | Gq/11                                |
| ELTD1          | 22.9 | Unknown                              |
| EMR1           | 24.8 | Unknown                              |
| F2R (PAR1)     | 14.8 | Gq/11, Gi/0, G12/13                  |
| F2RL1 (PAR2)   | 19.5 | Gq/11, Gi/0                          |
| FPR1           | 22.8 | Gi/0                                 |
| FPR-RS2 (FPR3) | 23.9 | Gi/0                                 |
| FPR-RS3        | 23.9 | Unknown                              |
| FPR-RS6        | 25.5 | Unknown                              |
| FPR-RS7        | 25.0 | Unknown                              |
| FZD1           | 16.6 | WNT                                  |
| FZD2           | 17.1 | WNT                                  |
| FZD3           | 18.5 | WNT, Gs                              |
| FZD4           | 16.6 | G12/13, Non-canonical signaling, WNT |
| FZD5           | 18.7 | WNT                                  |
| FZD6           | 17.7 | Gi/0, Gq/11, WNT                     |
| FZD7           | 16.9 | Gs, Gi/0, WNT                        |
| FZD8           | 18.0 | WNT                                  |
| FZD9           | 21.6 | Unknown                              |
| GABBR1         | 17.5 | Gi/0                                 |
| GALR2          | 23.3 | Gq/11                                |
| GPBAR1         | 20.7 | Gs                                   |

|                 |      |                         |
|-----------------|------|-------------------------|
| GPR1            | 23.3 | Unknown                 |
| GPR108          | 17.5 | Unknown                 |
| GPR114 (ADGRG5) | 23.3 | Unknown                 |
| GPR115 (ADGRF4) | 24.0 | Unknown                 |
| GPR116 (ADGRF5) | 23.1 | Unknown                 |
| GPR119          | 26.3 | Gs                      |
| GPR124 (ADGRA2) | 15.6 | Unknown                 |
| GPR125 (ADGRA3) | 16.0 | Unknown                 |
| GPR133 (ADGRD1) | 22.8 | Gs                      |
| GPR135          | 20.3 | Unknown                 |
| GPR137          | 17.7 | Unknown                 |
| GPR137b         | 16.0 | Unknown                 |
| GPR146          | 21.3 | Unknown                 |
| GPR149          | 24.2 | Unknown                 |
| GPR151          | 21.0 | Unknown                 |
| GPR152          | 25.0 | Unknown                 |
| GPR153          | 18.0 | Unknown                 |
| GPR156          | 22.5 | Unknown                 |
| GPR160          | 23.1 | Unknown                 |
| GPR161          | 17.8 | Unknown                 |
| GPR162          | 23.0 | Unknown                 |
| GPR17           | 23.4 | Gi/0                    |
| GPR173          | 20.7 | Unknown                 |
| GPR175 (TPRA1)  | 19.8 | Unknown                 |
| GPR176          | 16.3 | Unknown                 |
| GPR18           | 21.5 | Gi/0, Gq/11             |
| GPR183 (EBI2)   | 20.4 | Gi/0                    |
| GPR19           | 26.6 | Unknown                 |
| GPR20           | 23.6 | Gi/0                    |
| GPR21           | 20.1 | Gq/11                   |
| GPR23 (LPA4)    | 17.7 | Gi/0, Gq/11, Gs, G12/13 |
| GPR3            | 23.2 | Gs                      |
| GPR30 (GPER)    | 21.3 | Gi/0                    |
| GPR34           | 21.5 | Gi/0                    |
| GPR35           | 24.3 | Unknown                 |
| GPR39           | 20.2 | Gq/11                   |
| GPR4            | 21.1 | Gs, Gq/11, Gi/0, G12/13 |
| GPR44 (PTGDR2)  | 24.1 | Gi/0                    |
| GPR56 (ADGRG1)  | 19.9 | Gq/11, G12/13           |
| GPR61           | 21.4 | Constitutive?           |



|                |      |               |
|----------------|------|---------------|
| GPR62          | 20.4 | Unknown       |
| GPR63          | 20.3 | Unknown       |
| GPR64 (ADGRG2) | 22.8 | Gs, Gq        |
| GPR65          | 23.4 | Gs            |
| GPR75          | 19.8 | Gq/11         |
| GPR81 (HCAR1)  | 22.8 | Gi/0          |
| GPR82          | 19.0 | Unknown       |
| GPR84          | 24.2 | Gi/0          |
| GPR85          | 18.4 | Unknown       |
| GPR92 (LPAR5)  | 24.4 | Gq/11, G12/13 |
| GPRC5A         | 17.9 | Unknown       |
| GPRC5B         | 17.4 | Unknown       |
| GRM6           | 20.0 | Gi/0          |
| HRH1           | 21.5 | Gq/11         |
| HRH2           | 26.7 | Gq/11         |
| HTR1B          | 21.1 | Gi/0          |
| HTR1D          | 23.8 | Gi/0          |
| HTR2A          | 18.8 | Gq/11         |
| KISS1R         | 25.4 | Gq/11         |
| LENG4          | 16.8 | Unknown       |
| LGR4           | 20.8 | Unknown       |
| LGR5           | 21.4 | Unknown       |
| LGR6           | 22.7 | Unknown       |
| LGR7 (RXFP1)   | 23.6 | Gs, Gi/0      |
| LPHN1 (ADGRL1) | 16.0 | Gq/11         |
| LPHN2 (ADGRL2) | 15.6 | Unknown       |
| LPHN3 (ADGRL3) | 20.3 | Unknown       |
| LTB4R2         | 23.7 | Gi/0          |
| MAS1           | 21.3 | Gi/0, Gq/11   |
| MASS1 (ADGRV1) | 22.1 | Unknown       |
| MC1R           | 22.9 | Gs            |
| MC3R           | 24.5 | Gs            |
| MC4R           | 25.7 | Gs            |
| MRGPRB5        | 25.3 | Unknown       |
| MRGPRE         | 23.2 | Unknown       |
| MRGPRF         | 20.5 | Unknown       |
| MTNR1A         | 24.3 | Gi/0          |
| NPBWR1         | 24.7 | Gi/0          |
| NPY1R          | 24.4 | Gi/0          |
| NPY6R          | 23.2 | Gi/0          |

|              |      |                          |
|--------------|------|--------------------------|
| OPRL1        | 25.9 | Gi/0                     |
| P2RY14       | 25.2 | Gi/0                     |
| P2RY2        | 23.7 | Gq/11                    |
| P2RY5 (LPA6) | 15.9 | Gs, Gi/0, G12/13         |
| P2RY6        | 23.1 | Gq/11                    |
| PRLHR        | 25.7 | Gq/11                    |
| PROKR1       | 20.1 | Gq/11                    |
| PROKR2       | 24.4 | Gq/11                    |
| PTAFR        | 26.4 | Gq/11, Gi/0, independent |
| PTGER1       | 22.1 | Gq/11                    |
| PTGER4       | 17.7 | Gs                       |
| PTGIR        | 25.8 | Gs                       |
| PTHR1        | 19.6 | Gs                       |
| PTHR2        | 23.9 | Gs, Gq/11                |
| RXFP3        | 21.5 | Gi/0                     |
| RXFP4        | 22.6 | Gi/0                     |
| SMO          | 15.0 | Gi/0, G12/13             |
| SSTR3        | 24.4 | Gi/0                     |
| SSTR4        | 22.9 | Gi/0                     |
| TACR2        | 23.4 | Gs, Gq/11                |
| TACR3        | 25.0 | Gq/11                    |
| TBXA2R       | 20.1 | Gq/11                    |
| TM7SF3       | 16.3 | Unknown                  |
| VIPR1        | 23.0 | Gs                       |
| VIPR2        | 22.4 | Gs                       |
| XCR1         | 25.3 | Gi/0                     |
| ACTB         | 8.5  | Reference                |
| GAPDH        | 8.8  | Reference                |
| HPRT         | 14.2 | Reference                |

**Supplementary Table 2: GPCRs expressed in mature brown adipocytes**

| Name           | $\Delta C_t$ | Primary Linkage or role |
|----------------|--------------|-------------------------|
| ADCYAP1R1      | 18.3         | Gs                      |
| ADMR           | 22.6         | Unknown                 |
| ADORA1         | 21.3         | Gi/0                    |
| ADORA2A        | 19.6         | Gs                      |
| ADORA2B        | 20.7         | Gs                      |
| ADRA1A         | 22.3         | Gq/11                   |
| ADRA1B         | 19.6         | Gq/11                   |
| ADRA1D         | 18.7         | Gq/11                   |
| ADRA2A         | 21.4         | Gi/0                    |
| ADRA2B         | 20.8         | Gi/0                    |
| ADRA2C         | 21.5         | Gi/0                    |
| ADRB1          | 19.8         | Gs                      |
| ADRB2          | 20.6         | Gs                      |
| ADRB3          | 20.2         | Gs                      |
| AGTR1A         | 20.4         | Gi/0, Gq/11             |
| AGTR1B         | 24.0         | Gi/0, Gq/11             |
| AGTR2          | 14.4         | Gi/0                    |
| AGTRL1         | 21.7         | Gi/0                    |
| AVPR1A         | 17.8         | Gq/11                   |
| BAI2 (ADGRB2)  | 22.7         | G16 (Gq)                |
| BDKRB1         | 22.2         | Gi/0, Gq/11             |
| BDKRB2         | 22.2         | Gs, Gi/0, Gq/11         |
| C3AR1          | 18.9         | Unknown                 |
| C5R1           | 16.9         | Gi/0                    |
| CALCRL         | 19.0         | Gs                      |
| CCR1           | 22.3         | Gi/0                    |
| CCR2           | 21.6         | Gi/0                    |
| CCR3           | 21.2         | Gi/0                    |
| CCR4           | 22.7         | Gi/0                    |
| CCR5           | 22.6         | Gi/0                    |
| CCR6           | 24.7         | Gi/0                    |
| CCR8           | 22.1         | Gi/0                    |
| CCR9           | 21.7         | Gi/0                    |
| CCRL1 (CX3CR1) | 22.2         | Gi/0                    |
| CCRL2          | 19.8         | Unknown                 |
| CD97 (ADGRE5)  | 16.8         | G12/13                  |
| CELSR2         | 20.4         | Other                   |

|                |      |                     |
|----------------|------|---------------------|
| CHRM1          | 22.3 | Gq/11               |
| CHRM2          | 22.7 | Gi/0                |
| CHRM3          | 21.6 | Gq/11               |
| CHRM4          | 21.2 | Gi/0                |
| CHRM5          | 22.8 | Gq/11               |
| CMKLR1         | 20.6 | Gi/0                |
| CMKOR1 (ACKR3) | 24.3 | Unknown             |
| CNR1           | 22.3 | Gi/0                |
| CNR2           | 23.5 | Gi/0                |
| CX3CR1         | 22.2 | Gi/0                |
| CXCR3          | 21.4 | Gi/0                |
| CXCR6          | 20.8 | Gi/0                |
| CYSLTR1        | 22.0 | Gq/11               |
| CYSLTR2        | 23.7 | Gq/11               |
| DARC           | 24.4 | Unknown             |
| DRD1           | 24.1 | Gs                  |
| DRD5           | 24.8 | Gs                  |
| EDG1 (S1PR1)   | 19.9 | Gi/0                |
| EDG2 (LPAR1)   | 17.2 | Gi/0, Gq/11, G12/13 |
| EDG3 (S1PR3)   | 22.4 | Gi/0, Gq/11, G12/13 |
| EDG4 (LPAR2)   | 20.8 | Gi/0, Gq/11, G12/13 |
| EDG5 (S1PR2)   | 24.9 | Gq/11, G12/13, Gs   |
| EDG6 (S1PR4)   | 21.2 | Gi/0, G12/13        |
| EDG7 (LPAR3)   | 23.6 | Gi/0, Gq/11         |
| EDG8 (S1PR5)   | 22.5 | Gi/0, G12/13        |
| EDNRA          | 18.0 | Gq/11               |
| EDNRB          | 21.1 | Gq/11, Gi/0, Gs     |
| EMR1           | 18.0 | Unknown             |
| F2R (PAR1)     | 17.6 | Gq/11, Gi/0, G12/13 |
| F2RL1 (PAR2)   | 22.2 | Gq/11, Gi/0         |
| FFAR1          | 24.5 | Gq/11               |
| FFAR2          | 22.8 | Gq/11               |
| FPR1           | 22.0 | Gi/0                |
| FPRL1 (FPR2)   | 23.0 | Gi/0                |
| FPR-RS2 (FPR3) | 22.1 | Gi/0                |
| FPR-RS3        | 22.2 | Unknown             |
| FPR-RS4        | 23.0 | Unknown             |
| FPR-RS6        | 22.6 | Unknown             |
| FPR-RS7        | 23.5 | Unknown             |
| FZD1           | 16.7 | WNT                 |

|                 |      |                                      |
|-----------------|------|--------------------------------------|
| FZD10           | 20.4 | Beta-catenin                         |
| FZD2            | 18.2 | WNT                                  |
| FZD3            | 20.0 | WNT, Gs                              |
| FZD4            | 16.0 | G12/13, Non-canonical signaling, WNT |
| FZD5            | 18.4 | WNT                                  |
| FZD6            | 21.1 | Gi/0, Gq/11, WNT                     |
| FZD7            | 16.7 | Gs, Gi/0, WNT                        |
| FZD8            | 18.5 | WNT                                  |
| FZD9            | 21.3 | Unknown                              |
| GABBR1          | 18.4 | Gi/0                                 |
| GALR2           | 21.9 | Gq/11                                |
| GIPR            | 25.0 | Gs                                   |
| GNRHR           | 26.6 | Gq/11                                |
| GPBAR1          | 20.3 | Gs                                   |
| GPR1            | 23.8 | Unknown                              |
| GPR108          | 16.9 | Unknown                              |
| GPR109a (HCAR2) | 21.6 | Gi/0                                 |
| GPR115 (ADGRF4) | 27.3 | Unknown                              |
| GPR116 (ADGRF5) | 24.4 | Unknown                              |
| GPR119          | 22.1 | Gs                                   |
| GPR12           | 23.9 | Gs, Gi/0                             |
| GPR120 (FFAR4)  | 17.8 | Gq/11                                |
| GPR124 (ADGRA2) | 16.2 | Unknown                              |
| GPR125 (ADGRA3) | 17.9 | Unknown                              |
| GPR132          | 23.8 | Gs, G12/13                           |
| GPR133 (ADGRD1) | 19.4 | Gs                                   |
| GPR135          | 20.8 | Unknown                              |
| GPR137          | 18.4 | Unknown                              |
| GPR137b         | 16.1 | Unknown                              |
| GPR141          | 22.2 | Unknown                              |
| GPR146          | 19.3 | Unknown                              |
| GPR150          | 23.4 | Unknown                              |
| GPR151          | 20.8 | Unknown                              |
| GPR152          | 22.6 | Unknown                              |
| GPR153          | 17.7 | Unknown                              |
| GPR156          | 23.5 | Unknown                              |
| GPR160          | 22.0 | Unknown                              |
| GPR161          | 19.5 | Unknown                              |
| GPR162          | 22.0 | Unknown                              |
| GPR17           | 22.7 | Gi/0                                 |

|                |      |                         |
|----------------|------|-------------------------|
| GPR171         | 23.2 | Unknown                 |
| GPR173         | 21.1 | Unknown                 |
| GPR175 (TPRA1) | 20.9 | Unknown                 |
| GPR176         | 19.3 | Unknown                 |
| GPR18          | 20.3 | Gi/0, Gq/11             |
| GPR183 (EBI2)  | 19.5 | Gi/0                    |
| GPR19          | 22.7 | Unknown                 |
| GPR20          | 22.9 | Gi/0                    |
| GPR21          | 20.2 | Gq/11                   |
| GPR23 (LPAR4)  | 18.0 | Gi/0, Gq/11, Gs, G12/13 |
| GPR3           | 22.8 | Gs                      |
| GPR30 (GPER)   | 21.8 | Gi/0                    |
| GPR33          | 24.4 | Gi/0                    |
| GPR34          | 20.9 | Gi/0                    |
| GPR35          | 22.4 | Unknown                 |
| GPR39          | 22.0 | Gq/11                   |
| GPR4           | 20.4 | Gs, Gq/11, Gi/0, G12/13 |
| GPR44 (PTGDR2) | 22.8 | Gi/0                    |
| GPR45          | 22.8 | Unknown                 |
| GPR55          | 24.1 | Gq/11, G12/13           |
| GPR56 (ADGRG1) | 23.7 | Gq/11, G12/13           |
| GPR6           | 22.3 | Gs, Gi/0                |
| GPR61          | 19.6 | Constitutive?           |
| GPR62          | 20.0 | Unknown                 |
| GPR63          | 20.0 | Unknown                 |
| GPR64 (ADGRG2) | 23.8 | Gs, Gq                  |
| GPR65          | 19.7 | Gs                      |
| GPR75          | 19.9 | Gq/11                   |
| GPR77 (C5AR2)  | 23.1 | Arrestin?               |
| GPR81 (HCAR1)  | 19.4 | Gi/0                    |
| GPR82          | 18.8 | Unknown                 |
| GPR84          | 23.2 | Gi/0                    |
| GPR85          | 19.6 | Unknown                 |
| GPR87          | 22.0 | Unknown                 |
| GPR92 (LPAR5)  | 20.6 | Gq/11, G12/13           |
| GPRC5A         | 18.6 | Unknown                 |
| GPRC5B         | 17.7 | Unknown                 |
| GPRC5C         | 23.5 | Unknown                 |
| GRM3           | 26.3 | Gi/0                    |
| HRH1           | 21.1 | Gq/11                   |

|                |      |             |
|----------------|------|-------------|
| HRH2           | 21.5 | Gq/11       |
| HTR1A          | 23.3 | Gi/0        |
| HTR1B          | 21.5 | Gi/0        |
| HTR1D          | 22.7 | Gi/0        |
| HTR1F          | 25.0 | Gi/0        |
| HTR2A          | 20.2 | Gq/11       |
| HTR2B          | 26.5 | Gq/11       |
| IL8RA          | 22.4 | Gi/0        |
| IL8RB          | 21.0 | Gi/0        |
| KISS1R         | 22.5 | Gq/11       |
| LENG4          | 17.5 | Unknown     |
| LGR4           | 18.2 | Unknown     |
| LGR6           | 19.2 | Unknown     |
| LPHN1 (ADGRL1) | 17.0 | Gq/11       |
| LPHN2 (ADGRL2) | 16.8 | Unknown     |
| LPHN3 (ADGRL3) | 21.3 | Unknown     |
| LTB4R          | 22.3 | Gq/11, Gi/0 |
| LTB4R2         | 21.5 | Gi/0        |
| MAS1           | 21.0 | Gi/0, Gq/11 |
| MASS1 (ADGRV1) | 25.1 | Unknown     |
| MC1R           | 21.9 | Gs          |
| MC2R           | 19.9 | Gs          |
| MC3R           | 24.3 | Gs          |
| MC4R           | 21.6 | Gs          |
| MC5R           | 20.9 | Gs          |
| MRGPRA2        | 22.1 | Unknown     |
| MRGPRA4        | 24.1 | Unknown     |
| MRGPRA6        | 23.0 | Unknown     |
| MRGPRB1        | 24.3 | Unknown     |
| MRGPRB2        | 24.9 | Gq/11       |
| MRGPRB4        | 24.1 | Unknown     |
| MRGPRB5        | 23.1 | Unknown     |
| MRGPRD         | 21.5 | Gi/0, Gq/11 |
| MRGPRE         | 22.3 | Unknown     |
| MRGPRF         | 19.9 | Unknown     |
| MRGPRG         | 23.5 | Unknown     |
| NPY1R          | 24.2 | Gi/0        |
| NPY2R          | 24.5 | Gi/0        |
| NPY6R          | 23.0 | Gi/0        |
| OXGR1          | 25.5 | Gq/11       |

|              |      |                          |
|--------------|------|--------------------------|
| OXTR         | 24.2 | Gq/11                    |
| P2RY13       | 22.8 | Gi/0                     |
| P2RY14       | 22.8 | Gi/0                     |
| P2RY2        | 22.7 | Gq/11                    |
| P2RY5 (LPA6) | 16.7 | Gs, Gi/0, G12/13         |
| P2RY6        | 20.0 | Gq/11                    |
| PPYR1        | 21.2 | Gi/0                     |
| PRLHR        | 23.2 | Gq/11                    |
| PROKR1       | 19.8 | Gq/11                    |
| PTAFR        | 20.2 | Gq/11, Gi/0, independent |
| PTGER1       | 22.7 | Gq/11                    |
| PTGER2       | 23.1 | Gs                       |
| PTGER3       | 21.5 | Gi/0                     |
| PTGER4       | 18.6 | Gs                       |
| PTGFR        | 21.5 | Gq/11                    |
| PTHR1        | 17.3 | Gs                       |
| RXFP3        | 21.6 | Gi/0                     |
| RXFP4        | 21.8 | Gi/0                     |
| SCTR         | 22.1 | Gs                       |
| SMO          | 16.7 | Gi/0, G12/13             |
| SSTR1        | 20.5 | Gi/0                     |
| SSTR3        | 22.6 | Gi/0                     |
| SSTR4        | 21.3 | Gi/0                     |
| SSTR5        | 22.3 | Gi/0                     |
| SUCNR1       | 24.7 | Gi/0, Gq/11              |
| TAAR1        | 22.2 | Gs                       |
| TAAR9        | 22.7 | Unknown                  |
| TBXA2R       | 21.4 | Gq/11                    |
| TM7SF3       | 16.6 | Unknown                  |
| TSHR         | 18.8 | Gs                       |
| VIPR1        | 25.2 | Gs                       |
| VIPR2        | 21.0 | Gs                       |
| XCR1         | 22.2 | Gi/0                     |
| ACTB         | 9.8  | Reference                |
| GAPDH        | 9.7  | Reference                |
| HPRT         | 15.0 | Reference                |



**Supplementary Table 3: qPCR primer sequences**

| Name   | Species | Forward                               | Reverse                            |
|--------|---------|---------------------------------------|------------------------------------|
| 28S    | human   | GCC TAG CAG CCG ACT TAG AA            | AAA TCA CAT CGC GTC AAC AC         |
| ADRA1A | human   | ACT TCT CAG TGA GGC TCC T             | AGG GCT TGA AAT CAG GGA AG         |
| AGTR1  | human   | CCG CCC CTC AGA TAA TGT AAG           | TCG AAC ATG TCA CTC AAC CTC        |
| aP2    | human   | TGT GCA GAA ATG GGA TGG AAA           | CAA CGT CCC TTG GCT TAT GCT        |
| CHRM3  | human   | CAC CAA GTT ACC CTC ATC GG            | AAA ACT GCC TCC ATC GTC C          |
| EDNRA  | human   | TGC CCT CAG TGA ACA TCT TAA G         | CAT CGG TTC TTG TCC ATC TCG        |
| EDNRB  | human   | GTC CCA ATA TCT TGA TCG CCA G         | AAG GCA CCA GCT TAC ACA TCT        |
| GAPDH  | human   | TGG TCT CCT CTG ACT TCA AC            | GTG AGG GTC TCT CTC TTC CT         |
| Gq     | human   | GTG GAG AAG GTG TCT GCT TTT GA        | ATC TTG TTG CGT AGG CAG GTA GG     |
| PPARg  | human   | AGC CTC ATG AAG AGC CTT CCA           | TCC GGA AGA AAC CCT TGC A          |
| UCP1   | human   | TGC CCA ACT GTG CAA TGA A             | CCA GGA TCC AAG TCGCAA GA          |
| 18S    | murine  | CCA TCC AAT CGG TAGT AGC G            | GTA ACC CGT TGA ACC CCA TT         |
| ADRA1A | murine  | TTC CTC GTG ATG CCC ATT G             | GCT TTC TTG AAC TCC TGG CTG        |
| AGTR1A | murine  | GAC CAA CTC AAC CCA GAA AAG C         | ATC ACC ACC AAG CTG TTT CC         |
| AGTR1B | murine  | TGG CTT GGC TAG TTT GCC G             | ACC CAG TCC AAT GGG GAG T          |
| CHRM3  | murine  | ACA GTA GCA GTG ACA GTT GG            | GAG TTG AGG ATG GTG CTA TGA C      |
| DIO2   | murine  | GCG ATG GCA AAG ATA GGT GA            | GAA TGG AGC TGG GTG TAG CA         |
| ECE-1  | murine  | ATG ACG CCG CCC ATG GTG AAC           | TGG TTG GGC TAA GAC ATA AC         |
| EDNRA  | murine  | GCT GGT TCC CTC TTC ACT TAA GC        | TCA TGG TTG CCA GGT TAA TGC        |
| EDNRB  | murine  | TGT GCT CTA AGT ATT AGA CAG ATA TCG A | GGC TGT CTT GTA AAA CTG CAT GA     |
| ET1    | murine  | GGA AAC TAC GAA GGT TGG AGG C         | CTG TAG AAG CCA CAC AGA TGG TCT    |
| G11    | murine  | CAC AGG GGC CTC TTC CAA AT            | CAG GCA AGG TGCA GTG ACT A         |
| Gq     | murine  | GTG CCT GCA CAC CTT ACT CT            | AAC TAA GAA GCC CTT CCC GC         |
| HPRT   | murine  | GTC CCA GCG TCG TGA TTA GC            | TCA TGA CAT CTC GAG CAA GTC TTT    |
| HPRT   | murine  | ACA TTG TGG CCC TCT GTG TGC TCA       | CTG GCA ACA TCA ACA GGA CTC CTC GT |
| mutGq  | murine  | TAG CCG ACC CTT CCT ATC TGC           | TCT GAC CTT TGG CCC CCT A          |
| ND5    | murine  | AGC ATT CGG AAG CAT CCT TG            | TTG TGA GGA CTG GAA TGC TG         |
| NUFA   | murine  | AGA CGC ATC TCT GGT GTC AA            | GCC AGG AAA ATG CTT CCT TA         |
| PGC1a  | murine  | GCACACACCGCAATTCTCCCTTGTA             | ACG CTG TCC CAT GAG GTA TTG ACC A  |
| UCP1   | murine  | TAA GCC GGC TGA GAT CTT GT            | GGC CTC TAC GAC TCA GTC CA         |
